# Supplementary material for: Constructing a Prediction Model for Clinically Significant Prostate Cancer Combined with Radiomics Features of MRI and PRKY Promoter Methylation Level in Urine Samples
Source: Research Square preprint supplement (doi:10.21203/rs.3.rs-6806278/v1), 2025-07-23
Supplement: Supplementary file 1 [file 9f057c5c0d7c5f88fbb61c36.xlsx]

## Sheet: Sheet1
NUMBER	GROUP	dADC100_2000_shape_Elongation	dADC100_2000_shape_Flatness	dADC100_2000_shape_LeastAxisLength	dADC100_2000_shape_MajorAxisLength	dADC100_2000_shape_Maximum2DDiameterColumn	dADC100_2000_shape_Maximum2DDiameterRow	dADC100_2000_shape_Maximum2DDiameterSlice	dADC100_2000_shape_Maximum3DDiameter	dADC100_2000_shape_MeshVolume	dADC100_2000_shape_MinorAxisLength	dADC100_2000_shape_Sphericity	dADC100_2000_shape_SurfaceArea	dADC100_2000_shape_SurfaceVolumeRatio	dADC100_2000_shape_VoxelVolume	dADC100_2000_firstorder_10Percentile	dADC100_2000_firstorder_90Percentile	dADC100_2000_firstorder_Energy	dADC100_2000_firstorder_Entropy	dADC100_2000_firstorder_InterquartileRange	dADC100_2000_firstorder_Kurtosis	dADC100_2000_firstorder_Maximum	dADC100_2000_firstorder_MeanAbsoluteDeviation	dADC100_2000_firstorder_Mean	dADC100_2000_firstorder_Median	dADC100_2000_firstorder_Minimum	dADC100_2000_firstorder_Range	dADC100_2000_firstorder_RobustMeanAbsoluteDeviation	dADC100_2000_firstorder_RootMeanSquared	dADC100_2000_firstorder_Skewness	dADC100_2000_firstorder_TotalEnergy	dADC100_2000_firstorder_Uniformity	dADC100_2000_firstorder_Variance	dADC100_2000_glcm_Autocorrelation	dADC100_2000_glcm_ClusterProminence	dADC100_2000_glcm_ClusterShade	dADC100_2000_glcm_ClusterTendency	dADC100_2000_glcm_Contrast	dADC100_2000_glcm_Correlation	dADC100_2000_glcm_DifferenceAverage	dADC100_2000_glcm_DifferenceEntropy	dADC100_2000_glcm_DifferenceVariance	dADC100_2000_glcm_Id	dADC100_2000_glcm_Idm	dADC100_2000_glcm_Idmn	dADC100_2000_glcm_Idn	dADC100_2000_glcm_Imc1	dADC100_2000_glcm_Imc2	dADC100_2000_glcm_InverseVariance
1	1	0.603711	0.446393	5.04036	11.2913	12.2225	12.056	9.06547	12.9711	174.638	6.81668	0.662993	227.895	1.30496	202.089	847.3	1431	69135853	4.60437	332.25	2.09681	1615	179.798	1156.22	1144	787	828	137.245	1175.89	0.0565505	2.79431e+08	0.048	45872.4	221.963	64235.2	287.53	169.603	112.153	0.194781	8.85102	3.38547	28.2441	0.177994	0.0915268	0.919664	0.807581	-0.772838	0.999082	0.0785233
2	1	0.394323	0.283259	7.76001	27.3955	15.3846	14.6876	22.4171	24.2676	436.848	10.8027	0.554477	502.135	1.14945	501.18	1423	2003.7	372187907	4.89673	300.75	3.66702	2512	185.8	1716.04	1695.5	1203	1309	125.838	1732.49	0.469544	1.5043e+09	0.0388918	56721	460.481	302958	2920.88	314.899	87.0011	0.574261	7.27133	3.73774	30.5174	0.22633	0.138301	0.97162	0.887055	-0.680945	0.998662	0.139541
3	1	0.663834	0.328612	7.4688	22.7284	18.5759	20.4696	21.4025	24.4821	1354.16	15.0878	0.6	986.536	0.728521	1410.58	975.6	1635.4	585108692	5.19393	329	2.6845	1986	201.743	1270.49	1227	793	1193	142.93	1294.81	0.514919	2.36488e+09	0.0316664	62377.2	381.199	170693	1629.46	242.962	127.303	0.303324	8.60366	4.31145	47.0037	0.202333	0.11573	0.954948	0.862783	-0.397606	0.990845	0.116243
4	1	0.702034	0.418018	6.01903	14.399	12.125	15.1731	12.555	16.0785	423.207	10.1086	0.642518	424.262	1.00249	452.679	865.4	1704.9	184683718	5.24658	414.75	3.04009	2210	262.084	1241.79	1177.5	709	1501	179.855	1284.12	0.771657	7.4645e+08	0.0314094	106930	381.836	504835	5940.49	348.664	157.381	0.335819	9.95633	4.12358	53.432	0.175681	0.0937388	0.9622	0.868919	-0.681728	0.999262	0.0984249
5	1	0.651807	0.187337	2.607	13.9161	10.7089	10.127	9.98484	12.6151	46.4804	9.07062	0.546534	114.388	2.46099	76.7937	1750.6	2190.4	73838827	3.61635	200	2.09591	2219	132.332	1965.11	1931	1673	546	100.667	1971.36	0.0367357	2.9844e+08	0.0969529	24615.4	222.578	19007.6	-11.9781	90.2513	43.2058	0.293153	5.66162	2.04145	7.37237	0.237398	0.141087	0.928677	0.813643	-0.871993	0.998177	0.124016
6	1	0.428263	0.300706	6.91969	23.0114	13.7887	19.5993	20.6659	22.7785	426.239	9.85496	0.519009	527.729	1.23811	493.096	828.8	1551.7	171557081	5.04409	369.25	3.05982	1967	240.998	1148.58	1056.5	693	1274	167.214	1185.84	0.834029	6.93395e+08	0.037893	86965	272.896	219157	3092.09	189.316	160.165	-0.0165725	9.90016	3.87903	52.0951	0.181465	0.100012	0.950036	0.852283	-0.655899	0.998559	0.0985961
7	1	0.22795	0.20021	10.8071	53.9785	40.7356	15.91	42.5683	43.8111	1248.74	12.3044	0.443434	1264.65	1.01274	1382.29	1128	1690.9	693035998	5.01466	270.25	3.02768	2014	167.926	1407.09	1404	755	1259	113.809	1423.52	0.23747	2801094268	0.036336	46525.2	726.133	121703	486.178	189.199	66.7442	0.479044	6.35356	3.94063	24.5679	0.241149	0.150658	0.976242	0.895837	-0.400228	0.988969	0.16418
8	1	0.898428	0.354291	5.54226	15.6432	13.7887	13.8745	13.5858	16.6951	319.805	14.0543	0.596237	379.305	1.18605	347.592	723.5	1668.5	148896687	5.2664	551.75	3.14212	1890	308.413	1258.97	1344	184	1706	213.992	1315.81	-0.800514	6.01807e+08	0.0300162	146364	1873.09	647000	-4501.27	463.443	407.942	0.0669238	15.631	4.22438	143.045	0.133965	0.064465	0.931449	0.832048	-0.802064	0.999809	0.0692353
9	1	0.91478	0.702056	20.64	29.3993	33.4419	35.7946	35.8509	38.9891	9364.11	26.8939	0.643485	3338.8	0.356552	9477.96	816	1405.6	2814879679	5.11278	275	6.35336	2614	192.432	1064.21	999	614	2000	119.144	1095.62	1.59273	11377103487	0.0374294	67826.3	354.554	430458	6260.33	245.467	60.9295	0.57054	5.65522	3.95905	27.9951	0.274863	0.185118	0.991136	0.938004	-0.14578	0.85623	0.19277
10	1	0.927642	0.584892	21.109	36.0903	38.6541	39.9892	43.1967	43.8757	14347.5	33.4789	0.547487	5215.47	0.363512	14526.1	925.3	1601.7	6291813713	5.42076	289.75	11.2617	3526	263.856	1253.46	1152	329	3197	125.765	1323.12	2.66468	2.54301e+10	0.0324555	179486	1408.91	6.25596e+06	49469	677.115	142.189	0.618763	7.20432	4.22149	87.663	0.255296	0.166337	0.99236	0.950824	-0.175664	0.904876	0.171636
12	1	0.560313	0.346337	5.01409	14.4775	14.0169	12.5997	11.837	16.0344	330.668	8.11193	0.674417	342.886	1.03695	367.801	985.9	2022.1	186049058	5.30086	661.25	1.7697	2235	327.051	1498.44	1488.5	882	1353	263.629	1544.42	0.0386477	8.77296e+08	0.0279421	139934	541.042	674365	641.067	603.482	302.117	0.31672	13.6931	3.96045	92.2295	0.153317	0.0836059	0.919884	0.819012	-0.816763	0.999812	0.10243
14	1	0.704533	0.493902	5.42252	10.979	11.8601	11.8601	10.4464	12.3607	250.77	7.73504	0.716859	268.267	1.06977	280.23	920.6	1597.4	102501737	4.72321	291	2.61613	1835	187.983	1232.69	1236	774	1061	127.288	1255.77	0.234977	441908005	0.0442604	57419.5	332.14	99601.1	606.045	175.032	89.022	0.255767	7.79218	3.60585	25.4616	0.196986	0.108068	0.958467	0.858149	-0.695157	0.99883	0.104363
15	1	0.482682	0.448593	16.9587	37.8041	23.9943	38.4209	38.7407	40.0014	2853.83	18.2474	0.406719	2392.26	0.838264	3003.04	1021.2	1589.6	1310411555	5.16117	301.5	2.8494	1948	178.17	1309.29	1308	614	1334	125.123	1328.03	-0.0435744	5296385850	0.0321439	49427.2	856.357	160913	51.7653	246.343	73.9224	0.539146	6.7841	4.08446	26.6503	0.22725	0.137492	0.976469	0.894639	-0.302094	0.975808	0.149395
16	1	0.520035	0.483971	10.5756	21.8517	24.375	16.2692	25.641	25.7385	1448.41	11.3637	0.648277	954.96	0.659314	1525.63	575.4	1366.5	316969489	5.51146	393.75	3.48674	1892	241.413	981.728	982	0	1892	160.992	1031.34	-0.0648564	1622750290	0.0267105	99865.8	1555.87	522194	2347.15	367.527	198.77	0.293589	10.4333	4.55791	85.913	0.182121	0.101253	0.970081	0.888422	-0.509216	0.997562	0.103939
18	1	0.60473	0.396982	3.40121	8.56766	6.93724	6.93724	8.37003	10.1668	68.0365	5.18112	0.712429	113.128	1.66276	88.919	989.3	1452.4	35393419	3.75444	174.25	2.70172	1625	128.835	1257.32	1262.5	962	663	73.1875	1268.38	-0.0140671	1.43052e+08	0.0826446	27942.8	137.149	8857.52	-105.724	54.4109	76.7495	-0.143898	7.34222	2.36961	17.8427	0.194291	0.0999845	0.918459	0.806467	-0.849403	0.996695	0.105164
19	1	0.615794	0.258506	6.56471	25.3948	17.4107	23.4766	25.0564	26.4198	601.803	15.6379	0.483727	712.613	1.18413	697.879	1321	1862.6	373842915	4.91444	302.25	5.06494	2471	177.893	1571.87	1532	1120	1351	116.818	1589.33	1.11622	1.76282e+09	0.0405405	55185.2	357.934	136514	1833.28	153.34	80.8487	0.204034	7.23533	3.69716	25.7432	0.214986	0.125961	0.975088	0.889882	-0.640547	0.997881	0.126885
20	1	0.313892	0.240444	6.47411	26.9256	12.125	12.7679	23.9287	23.9287	186.427	8.45173	0.49802	316.891	1.69981	242.506	1286.8	2306.4	223783759	4.9899	487.75	2.51826	2507	299.328	1895.22	1953	1061	1446	211.859	1931.25	-0.549767	9.04483e+08	0.0366667	137883	946.487	473016	-1050.19	387.508	638.493	-0.142766	21.9912	3.0482	56.3944	0.0962884	0.0422062	0.858407	0.747176	-0.814153	0.997766	0.033392
21	1	0.880935	0.641875	11.4047	17.7678	18.5759	18.5759	20.9251	22.7418	963.794	15.6523	0.397934	1185.76	1.2303	1050.86	1139.5	1711	538954850	5.24284	300.5	3.57385	2161	184.945	1419.74	1401.5	836	1325	122.477	1439.76	0.441754	2178332917	0.0314497	57246	710.009	256791	1271.13	270.688	121.063	0.355622	8.57869	4.22055	44.3301	0.200755	0.115797	0.970466	0.884602	-0.548738	0.997774	0.114565
22	1	0.59281	0.383127	22.7025	59.2558	60.9971	53.7342	45.6088	69.135	10951.7	35.1275	0.33214	7180.43	0.655644	11359.4	1147	1674	4800315010	5.07183	265	4.06332	2321	165.3	1395.39	1375	331	1990	112.227	1411.62	0.384561	22635413587	0.0358147	45553.1	1851.4	133720	833.692	188.672	79.5013	0.403372	6.74593	4.15252	32.1648	0.236988	0.147189	0.988193	0.926047	-0.136189	0.857796	0.152554
23	1	0.586953	0.383002	6.55239	17.108	15.1732	18.3849	15.0893	18.5309	453.184	10.0416	0.623014	457.969	1.01056	497.138	0	1487.8	108435580	5.49308	851.5	2.27991	2013	460.445	758.927	723	0	2013	385.42	938.93	0.367806	4.38272e+08	0.0353625	305620	761.287	4.37053e+06	29815.1	1126.88	456.863	0.406574	16.4176	4.46094	154.274	0.155097	0.0938769	0.94288	0.846115	-0.713922	0.999329	0.0634337
24	1	0.582916	0.327277	5.79958	17.7207	17.0592	16.0836	10.7013	17.2164	191.479	10.3297	0.525863	305.51	1.59553	238.465	1021	1609.4	107391613	4.78893	348	2.28913	1759	184.251	1330.73	1344	841	918	137.005	1349.15	-0.228874	4.34052e+08	0.0399311	49357.7	544.195	51801.9	-657.123	135.66	79.196	0.207752	7.28384	2.85399	21.0882	0.206794	0.11706	0.951691	0.849253	-0.852057	0.999096	0.121598
25	1	0.869831	0.793388	15.7129	19.8048	21.4179	22.9811	22.8634	24.1217	3586.74	17.2268	0.793616	1427.82	0.398083	3649.72	1234	1804.8	2099407575	5.10111	278.5	4.97171	2604	174.105	1507.81	1492	1017	1587	118.391	1524.77	0.859546	8485328571	0.0341019	51425.8	445.612	310378	3650.13	237.591	100.056	0.410535	7.46099	4.26439	42.0635	0.222294	0.133108	0.978633	0.903685	-0.198548	0.929405	0.137123
26	1	0.337169	0.259585	4.44887	17.1384	12.0671	8.125	14.5437	15.9712	120.596	5.77854	0.506091	233.245	1.93409	168.946	412.24	876.981	1.71255e+07	4.11583	245.908	4.44592	913.473	156.532	639.245	681.573	0	913.473	104.477	671.321	-1.12643	7.61393e+07	0.065097	42037.6	614.759	35285.6	-632.98	61.5887	96.1161	-0.246375	7.50508	1.84562	17.8247	0.198806	0.104357	0.943063	0.845854	-0.833592	0.975691	0.134892
27	1	0.531515	0.470811	9.40905	19.9848	15.4249	16.9164	16.1669	22.3753	632.672	10.6222	0.517514	688.675	1.08852	715.663	1143.5	1663	346495488	4.64308	213.75	2.86894	1817	144.12	1432.53	1432.5	976	841	94.4571	1444.76	-0.309716	1.49382e+09	0.0461605	35179.7	349.471	60789.6	-323.087	158.191	91.5467	0.300785	7.72721	3.77978	26.2019	0.206724	0.119577	0.933356	0.828992	-0.586565	0.995156	0.129096
28	1	0.817875	0.552832	14.8963	26.9454	33.0492	25.8631	31.6813	34.4347	5337.16	22.038	0.671375	2199.85	0.412176	5480.64	879.5	1246.5	1532661609	4.54976	169	5.90459	2004	115.406	1051.55	1032	636	1368	72.7694	1063.15	1.13307	6194669267	0.0538207	24528.4	307.587	36109.3	667.755	87.227	35.4459	0.407949	4.5451	3.61296	14.0444	0.298306	0.206175	0.989172	0.928392	-0.122856	0.799606	0.216626
29	1	0.408103	0.255331	5.04934	19.7757	11.6071	9.29457	15.5726	16.6142	120.243	8.07051	0.516684	228.016	1.89629	161.671	1396.7	2375.6	164637297	4.70306	434.75	2.34492	2552	283.371	2000.08	2051	1293	1259	211.6	2028.78	-0.495302	6.65427e+08	0.04375	115632	1008.79	279507	-3153.04	285.463	221.598	0.022903	12.1504	2.54711	60.4071	0.147699	0.0724237	0.930849	0.824641	-0.892507	0.998168	0.0910045
30	0	0.53966	0.398809	12.3005	30.843	21.184	27.6102	29.0179	29.3036	780.399	16.6447	0.41685	983.368	1.26008	924.219	2533	3566.5	1881264564	5.73449	488	8.55907	4064	326.108	3065.74	3105.5	414	3650	209.691	3098.11	-1.29168	8.87092e+09	0.0224386	199497	11755	2.83852e+06	-17335.5	603.735	518.594	0.057478	17.3553	4.57305	192.193	0.130867	0.0667	0.978026	0.900907	-0.733423	0.99976	0.0696161
31	0	0.492197	0.423578	28.4355	67.1316	51.837	41.6328	47.2626	54.073	3446.57	33.042	0.356801	3092.54	0.897282	3824.19	1544	2742	3887311245	6.23766	624	5.33454	3569	402.746	2119.23	2139	0	3569	254.929	2189.35	-0.842201	1.83302e+10	0.0160995	302078	6491.02	1.4057e+07	-43093.6	1926.33	848.072	0.423608	20.8835	5.41291	371.986	0.124039	0.0616321	0.964744	0.884093	-0.593268	0.999083	0.0687861
32	0	0.457703	0.232193	11.1855	48.1733	40.4775	21.2764	50.9922	50.9922	841.362	22.0491	0.377007	1143.2	1.35875	994.276	2601.5	4013	2658006944	5.82139	694.75	2.62214	4095	403.891	3248.15	3234	1755	2340	285.293	3287.08	-0.154694	1.07431e+10	0.0233327	254452	3733.91	3.17029e+06	-2775.81	1033.41	505.147	0.337682	18.0673	4.83719	153.718	0.124907	0.0640484	0.949931	0.850112	-0.748277	0.999833	0.0642592
33	0	0.367257	0.133174	5.41887	40.6902	26.8645	16.5246	28.2414	28.895	370.833	14.9438	0.553976	450.587	1.21507	440.553	1457	2678.8	491380879	5.62018	788	2.91801	3539	399.197	2067.83	2033	1284	2255	301.723	2123.22	0.495842	1.98605e+09	0.0233145	232178	839.161	1.83417e+06	10500.9	853.623	377.616	0.367053	14.9932	4.18098	144.596	0.139849	0.0700002	0.960231	0.869097	-0.828273	0.999886	0.0741419
34	0	0.124959	0.0474122	3.17215	66.9058	48.75	9.5625	48.8742	48.8742	349.198	8.36047	0.536218	447.223	1.28071	430.045	2066	2529.4	445201367	4.59312	241	3.00019	2827	151.281	2294.35	2306	1863	964	104.607	2302.18	0.200155	2.27924e+09	0.0501701	35996.2	397.887	34779.2	98.0595	82.5552	63.0705	-0.0619528	6.52849	1.96433	16.662	0.223659	0.130888	0.964149	0.867368	-0.811548	0.982199	0.11885
35	0	0.682359	0.433155	7.83321	18.0841	18.9125	19.3003	16.7401	19.8848	619.907	12.3398	0.562197	625.384	1.00884	679.018	1828.2	3036.9	1008125780	5.74477	592	3.43444	3955	366.84	2405.1	2337.5	1660	2295	250.842	2449.64	0.740061	4.07462e+09	0.022038	216266	940.033	2.31802e+06	17055.9	787.574	294.608	0.415986	14.0733	4.60077	90.0959	0.136344	0.0674192	0.968513	0.87559	-0.70516	0.999759	0.0702612
36	0	0.377865	0.198176	6.517	32.8849	27.8571	14.6876	28.7145	28.7145	920.514	12.426	0.539767	847.81	0.921018	994.276	1399.5	2099.5	772236115	5.24059	322.75	2.95098	2478	207.697	1752.2	1721	1041	1437	140.801	1771.77	0.291916	3121203013	0.0319254	68969.2	833.988	230126	785.205	287.141	143.226	0.326197	9.56535	4.25115	45.407	0.179304	0.0960573	0.963256	0.869234	-0.543499	0.997742	0.0919538
37	0	0.149934	0.0333209	2.25444	67.6584	12.7679	10.4464	13.5858	42.8287	341.305	10.1443	0.607691	388.654	1.13873	409.566	2063	2911.5	472441043	4.9669	416.5	2.306	3089	251.307	2474.54	2454	1817	1272	183.371	2493.26	-0.154258	2.546e+09	0.0384349	92983.9	866.131	579812	-2015.9	508.44	76.6539	0.737445	7.13981	3.90466	24.2643	0.21335	0.125314	0.973492	0.885468	-0.644257	0.999055	0.138568
38	0	0.739559	0.237941	15.0376	63.1987	48.8616	19.1897	48.9706	49.2632	941.986	46.7392	0.407579	1140.17	1.21039	1093.7	2075	3872	2404346632	6.22933	889	2.21856	4095	529.405	3059.47	3133.5	1660	2435	389.032	3126.3	-0.325951	1.06896e+10	0.0159627	413401	3146.95	1.11076e+07	-35293.6	2476.51	238.105	0.822029	12.2718	4.40186	81.4	0.154626	0.0803653	0.976974	0.894645	-0.80889	0.999947	0.0736077
39	0	0.608315	0.370421	4.59889	12.4153	13.1578	9.88339	12.1182	13.361	273.044	7.55241	0.747303	272.36	0.997493	307.175	802.2	1738.4	97485932	4.98614	564	2.17706	1987	309.664	1256.95	1200	529	1458	234.267	1307.78	-0.0630869	525354679	0.0360111	130363	464.988	359315	-173.001	276.099	213.557	-0.095802	12.2849	2.73727	32.8817	0.147819	0.0763051	0.94524	0.837868	-0.838037	0.998214	0.0845151
40	0	0.339951	0.262695	9.3293	35.5138	12.5997	13.2765	41.1686	41.3171	425.369	12.073	0.641986	426.058	1.00162	476.256	1482	2060	319776093	4.86754	311	3.50181	2519	185.633	1763.95	1756	1277	1242	130.512	1779.35	0.453683	1507872638	0.0387217	54578.6	337.192	74225.3	80.2118	145.045	92.2062	0.186741	7.52859	3.8001	33.7957	0.20432	0.111699	0.967227	0.877484	-0.623543	0.998143	0.110625
41	0	0.611413	0.460845	18.6511	40.4716	39.5781	30.4526	39.1558	41.2849	1913.61	24.7448	0.470071	1585.71	0.828647	2069.39	1822.4	3279	3353878469	6.21712	752	3.34979	4095	463.628	2492.07	2396	1441	2654	318.878	2559.4	0.824281	1.35556e+10	0.0152435	340120	1884	1.26269e+07	83679.6	1657.38	421.02	0.59543	15.1935	5.04926	177.028	0.15238	0.0826594	0.96797	0.88543	-0.576924	0.999388	0.0711696
42	0	0.424484	0.275392	16.696	60.6264	44.6022	41.3416	35.3017	49.9727	1977.1	25.7349	0.387053	1968.18	0.99549	2220.28	439.3	1645.2	533145653	6.00032	600.5	2.95722	2433	369.906	1035.34	1014.5	0	2433	249.415	1137.56	0.0631642	2873138186	0.0188284	222119	1578.65	2.26331e+06	5319.45	780.227	322.542	0.378729	13.7177	4.90008	126.059	0.157659	0.0863258	0.969769	0.885835	-0.563367	0.999159	0.0897482
[truncated: 278 more columns]
