# Supplementary material for: Constructing a Prediction Model for Clinically Significant Prostate Cancer Combined with Radiomics Features of MRI and PRKY Promoter Methylation Level in Urine Samples
Source: Research Square preprint supplement (doi:10.21203/rs.3.rs-6806278/v1), 2025-07-23
Supplement: Supplementary file 2 [file ca90bfa9ff56d9a62485b03e.xlsx]

## Sheet: Sheet1
Table 1: Elements of the premixed solution in qPCR
Name	Volume(uL)	Name	Volume(Ul)
qPCR mix	12.5	qPCR mix	12.5
Ppmix	2.5	F-cg05163709	0.3
		R-cg05163709	0.3
		P-cg05163709	0.2
		F-cg05618150	0.3
		R-cg05618150	0.3
		P-cg05618150	0.2
		F-ACTB	0.25
		R-ACTB	0.25
		P-ACTB	0.15
		ddH2O	0.25
total	15	total	15
