# Supplementary material for: Constructing a Prediction Model for Clinically Significant Prostate Cancer Combined with Radiomics Features of MRI and PRKY Promoter Methylation Level in Urine Samples
Source: Research Square preprint supplement (doi:10.21203/rs.3.rs-6806278/v1), 2025-07-23
Supplement: Supplementary file 3 [file cc9ae28560008b459c137021.xlsx]

## Sheet: Sheet1
Table 2：MR scanning parameters
	TR(ms）	TE（ms）	Slice thickness（mm）	NEX	Field of view（mm*mm）	acquisition matrix
T2WI	3000	100	3	2	260*260	260*560
DWI	6500	65	3	2	260*260	224*224
