# Supplementary material for: Constructing a Prediction Model for Clinically Significant Prostate Cancer Combined with Radiomics Features of MRI and PRKY Promoter Methylation Level in Urine Samples
Source: Research Square preprint supplement (doi:10.21203/rs.3.rs-6806278/v1), 2025-07-23
Supplement: Supplementary file 4 [file dfdccba0d7543c98fb8b14ad.xlsx]

## Sheet: Sheet1
Table 2: Clinical data and PI-RADS scores of csPCA and nsPCA or BPH patients
		Total (n=39)		ncsPCa&BPH (n=13)		csPCa (n=26)		P value
Age (mean±SD)		72.28±5.54		71.15±4.93		72.85±5.84		0.3759
PSA (ng/mL)(median/IQR)		11(6.35/21.81)		11(6.11/12.30)		11(6.70/40.65)		0.2551
Prostate volume (mL)(mean±SD)		62.43±29.35		74.60±34.74		56.34±24.79		0.0663
PI-RADS score (num/percentage)								0.0105
	<3	5(12.82)		3(23.08)		2(7.69)
	3	13(33.33)		7(53.84)		6(23.08)
	≥4	21(53.85)		3(23.08)		18(69.23)
